# Supplementary material
Source: publisher site journal article supplement (https://www.dovepress.com/article/539555)
Supplement: Supplementary file 1 [file Supplementary%20table_1.pdf]

Table 1: Information of primary antibodies used in this study

| Protein targeted | Host   | Provider                  | Catalogue number |
|------------------|--------|---------------------------|------------------|
| APOB             | Rabbit | Proteintech, Wuhan, China | 20578-1-AP       |
| FASN             | Rabbit | Proteintech, Wuhan, China | 10624-2-AP       |
| P62              | Rabbit | Proteintech, Wuhan, China | 18420-1-AP       |
| LC3              | Rabbit | Proteintech, Wuhan, China | 14600-1-AP       |
| PLIN2            | Rabbit | Proteintech, Wuhan, China | 15294-1-AP       |
| $\alpha$ -SMA    | Rabbit | Proteintech, Wuhan, China | 14395-1-AP       |
| GAPDH            | Mouse  | Proteintech, Wuhan, China | 60004-1-Ig       |

Table 2: Information of secondary antibodies used in this study

| Protein targeted           | Host | Provider                                  | Catalogue number |
|----------------------------|------|-------------------------------------------|------------------|
| HRP-conjugated anti rabbit | Goat | TransGen Biotech Co., Ltd, Beijing, China | HS101-01         |
| HRP-conjugated anti mouse  | Goat | TransGen Biotech Co., Ltd, Beijing, China | HS201-01         |

Table 3: Primers for mouse RT-PCR

| Gene | Forward                     | Reverse                   | Provider                            | Catalogue number    |
|------|-----------------------------|---------------------------|-------------------------------------|---------------------|
| IL-6 | TAGTCCTTCCTA<br>CCCCAATTTCC | TTGGTCCTTAGCC<br>ACTCCTTC | Ruibiotech Co., Ltd, Beijing, China | 7093032/<br>7093033 |

|                  |                             |                             |                                        |                     |
|------------------|-----------------------------|-----------------------------|----------------------------------------|---------------------|
| IL-10            | GCTCTTACTGAC<br>TGGCATGAG   | CGCAGCTCTAGG<br>AGCATGTG    | Ruibiotech Co.,<br>Ltd, Beijing, China | 7093034/<br>7093035 |
| PDGFR<br>$\beta$ | GGCAGAAGAAG<br>CCACGCTAT    | AAGAGTGCCTCC<br>CAGAACAA    | Ruibiotech Co.,<br>Ltd, Beijing, China | 7093044/<br>7093045 |
| TGF $\beta$ 1    | CTCCCGTGGCTT<br>CTAGTGC     | CTCCCGTGGCTT<br>CTAGTGC     | Ruibiotech Co.,<br>Ltd, Beijing, China | 7093050/<br>7093051 |
| Col1- $\alpha$ 1 | GCTCCTCTTAGG<br>GGCCACT     | CCACGTCTCACC<br>ATTGGGG     | Ruibiotech Co.,<br>Ltd, Beijing, China | 7093052/<br>7093053 |
| LOX              | TCTTCTGCTGCG<br>TGACAACC    | GAGAAACCAGCT<br>TGGAACCAG   | Ruibiotech Co.,<br>Ltd, Beijing, China | 7093048/<br>7093049 |
| CCL2             | TTAAAAACCTGG<br>ATOGGAACCAA | GCATTAGCTTCA<br>GATTTACGGGT | Ruibiotech Co.,<br>Ltd, Beijing, China | 7093040/<br>7093041 |
| $\alpha$ -SMA    | GTOCCAGACAT<br>CAGGGAGTAA   | TOGGATACTTCA<br>GCGTCAGGA   | Ruibiotech Co.,<br>Ltd, Beijing, China | 7093042/<br>7093043 |
| GAPD<br>H        | GTGGCAAAGTG<br>GAGATTGTTG   | CGTTGAATTGCC<br>GTGAGTG     | Ruibiotech Co.,<br>Ltd, Beijing, China | 7093054/<br>7093055 |
